# Supplementary material for: The Arc of Cancer Mortality: Half a Century of U.S. Data from the CDC WONDER Database
Source: Research Square preprint supplement (doi:10.21203/rs.3.rs-7755712/v1), 2025-11-06
Supplement: Supplementary file 1 [file 714f73ab4f6a257dd18500aa.docx]

**Supplementary Material**

| **Supplementary Table 1. ICD codes of Cancers among U.S. Adults from 1968-2023** | |
| --- | --- |
| **Year Interval** | **ICD Codes** |
| **1968-1978** | ICD-8 codes: 140-149 (Malignant neoplasm of buccal cavity and pharynx); 150-159 (Malignant neoplasm of digestive organs and peritoneum), 160-163 (Malignant neoplasm of respiratory system); 170-174 (Malignant neoplasm of bone, connective tissue, skin, and breast), 180-189 (Malignant neoplasm of genitourinary organs); 190-199 (Malignant neoplasm of other and unspecified sites); 200-209 (Neoplasms of lymphatic and hematopoietic tissue) |
| **1979-1998** | ICD-9 Codes: 140-149 (Malignant neoplasm of lip, oral cavity, and pharynx); 150-159 (Malignant neoplasm of digestive organs and peritoneum); 160-165 (Malignant neoplasm of respiratory and intrathoracic organs); 170-175 (Malignant neoplasm of bone, connective tissue, skin, and breast); 179-189 (Malignant neoplasm of genitourinary organs); 190-199 (Malignant neoplasm of other and unspecified sites); 200-208 (Malignant neoplasm of lymphatic and hematopoietic tissue) |
| **1999-2023** | ICD-10 codes: C00-C97 (Malignant neoplasms) |

| **Supplementary Table 2: Overall, Sex-, Race-, and Age-Stratified Deaths due to Cancers among Adults in the United States (1968–2023)** | | | | | | | | |
| --- | --- | --- | --- | --- | --- | --- | --- | --- |
| **Year** | **Overall** | **Women** | **Men** | **Blacks or African Americans** | **Whites** | **Young Adults (25-44)** | **Middle-aged Adults (45-64)** | **Old Adults (65+)** |
| **1968** | 311840 | 141987 | 169853 | 30230 | 279812 | 18492 | 116385 | 176963 |
| **1969** | 316573 | 144250 | 172323 | 30912 | 283835 | 18352 | 117842 | 180379 |
| **1970** | 324121 | 147857 | 176264 | 31569 | 290716 | 17841 | 121000 | 185280 |
| **1971** | 330981 | 150899 | 180082 | 32670 | 296381 | 17669 | 121852 | 191460 |
| **1972** | 339520 | 154644 | 184876 | 33574 | 303856 | 17428 | 124214 | 197878 |
| **1973** | 345030 | 157265 | 187765 | 35361 | 307594 | 17184 | 125914 | 201932 |
| **1974** | 354828 | 161414 | 193414 | 36237 | 316308 | 16979 | 129017 | 208832 |
| **1975** | 360330 | 164008 | 196322 | 37036 | 320898 | 16645 | 128371 | 215314 |
| **1976** | 372021 | 169771 | 202250 | 38592 | 330953 | 16485 | 130993 | 224543 |
| **1977** | 381493 | 174196 | 207297 | 40247 | 338571 | 16753 | 132514 | 232226 |
| **1978** | 392123 | 179016 | 213107 | 41243 | 347940 | 16866 | 134115 | 241142 |
| **1979** | 398529 | 181410 | 217119 | 42315 | 353209 | 16918 | 133689 | 247922 |
| **1980** | 411615 | 188639 | 222976 | 44343 | 364041 | 17551 | 135675 | 258389 |
| **1981** | 417519 | 192325 | 225194 | 45157 | 368873 | 17545 | 135510 | 264464 |
| **1982** | 429103 | 197956 | 231147 | 46636 | 378756 | 18169 | 136652 | 274282 |
| **1983** | 438526 | 202718 | 235808 | 48125 | 386309 | 18570 | 137030 | 282926 |
| **1984** | 449372 | 209034 | 240338 | 49677 | 395210 | 19597 | 138413 | 291362 |
| **1985** | 457538 | 212978 | 244560 | 50338 | 402386 | 20026 | 138829 | 298683 |
| **1986** | 465384 | 217182 | 248202 | 51389 | 409038 | 20595 | 136605 | 308184 |
| **1987** | 473168 | 220721 | 252447 | 52447 | 415413 | 20305 | 136664 | 316199 |
| **1988** | 481401 | 225412 | 255989 | 53399 | 422173 | 20792 | 136422 | 324187 |
| **1989** | 492511 | 231261 | 261250 | 54980 | 431211 | 21056 | 135249 | 336206 |
| **1990** | 501779 | 235538 | 266241 | 56522 | 438721 | 21650 | 134742 | 345387 |
| **1991** | 511113 | 240812 | 270301 | 57366 | 446638 | 22228 | 134117 | 354768 |
| **1992** | 517060 | 244260 | 272800 | 57887 | 451669 | 22185 | 132815 | 362060 |
| **1993** | 526440 | 249068 | 277372 | 59323 | 459140 | 21834 | 133057 | 371549 |
| **1994** | 530924 | 252448 | 278476 | 59410 | 463084 | 21899 | 132839 | 376186 |
| **1995** | 535211 | 255529 | 279682 | 60041 | 466362 | 21985 | 132084 | 381142 |
| **1996** | 536337 | 256280 | 280057 | 60228 | 466878 | 21894 | 131455 | 382988 |
| **1997** | 536362 | 257085 | 279277 | 60797 | 465995 | 21706 | 131743 | 382913 |
| **1998** | 538364 | 258150 | 280214 | 60708 | 467600 | 21407 | 132771 | 384186 |
| **1999** | 546607 | 262622 | 283985 | 61389 | 474718 | 20737 | 135748 | 390122 |
| **2000** | 549841 | 265643 | 284198 | 61410 | 477448 | 20436 | 137039 | 392366 |
| **2001** | 550562 | 265311 | 285251 | 61674 | 477101 | 20563 | 139785 | 390214 |
| **2002** | 553986 | 267097 | 286889 | 62106 | 479870 | 19957 | 143028 | 391001 |
| **2003** | 553696 | 267545 | 286151 | 62176 | 478987 | 19250 | 145535 | 388911 |
| **2004** | 550679 | 265703 | 284976 | 61944 | 475638 | 18356 | 146476 | 385847 |
| **2005** | 556134 | 267571 | 288563 | 62651 | 479618 | 18167 | 149645 | 388322 |
| **2006** | 556876 | 268572 | 288304 | 62598 | 480205 | 17573 | 151788 | 387515 |
| **2007** | 559819 | 268682 | 291137 | 63577 | 481516 | 16751 | 153338 | 389730 |
| **2008** | 562443 | 268931 | 293512 | 63445 | 483523 | 16220 | 154494 | 391729 |
| **2009** | 564658 | 269605 | 295053 | 64149 | 484698 | 16178 | 157445 | 391035 |
| **2010** | 571810 | 272485 | 299325 | 65460 | 489416 | 15428 | 159712 | 396670 |
| **2011** | 573791 | 273234 | 300557 | 66356 | 490076 | 15216 | 161469 | 397106 |
| **2012** | 579666 | 275694 | 303972 | 66903 | 494594 | 15011 | 161158 | 403497 |
| **2013** | 582089 | 276079 | 306010 | 67516 | 495955 | 15022 | 159509 | 407558 |
| **2014** | 588893 | 279252 | 309641 | 68607 | 500754 | 14891 | 160116 | 413886 |
| **2015** | 593178 | 280942 | 312236 | 68936 | 503502 | 14613 | 159176 | 419389 |
| **2016** | 595276 | 282342 | 312934 | 70159 | 503864 | 14694 | 157655 | 422927 |
| **2017** | 596488 | 282845 | 313643 | 70320 | 504353 | 14516 | 154076 | 427896 |
| **2018** | 596674 | 282640 | 314034 | 70504 | 503872 | 14324 | 151248 | 431102 |
| **2019** | 597086 | 282642 | 314444 | 71373 | 502821 | 14272 | 147352 | 435462 |
| **2020** | 599888 | 283535 | 316353 | 71465 | 504790 | 14303 | 144832 | 440753 |
| **2021** | 602753 | 285548 | 317205 | 70542 | 505604 | 14809 | 141590 | 446354 |
| **2022** | 605804 | 287920 | 317884 | 71306 | 507214 | 14818 | 138496 | 452490 |
| **2023** | 610720 | 290090 | 320630 | 71433 | 511437 | 14794 | 134581 | 461345 |
| **Total** | **27876533** | **13146643** | **14729890** | **3116758** | **24161144** | **1009505** | **7823869** | **19043159** |

| **Supplementary Table 3: Overall and Sex-Stratified Cancer-Related Age-Adjusted Mortality Rates (AAMRs) per Million in Adults Aged 25 and Older in the United States (1968–2023)** | | | | | | | | | |
| --- | --- | --- | --- | --- | --- | --- | --- | --- | --- |
| **Year** | **Overall** | | | **Women** | | | **Men** | | |
| **AAMR** | **Lower 95% CI** | **Upper 95% CI** | **AAMR** | **Lower 95% CI** | **Upper 95% CI** | **AAMR** | **Lower 95% CI** | **Upper 95% CI** |
| **1968** | 3034.59 | 3023.49 | 3045.68 | 2504.66 | 2491.29 | 2518.03 | 3762.58 | 3743.34 | 3781.82 |
| **1969** | 3031.29 | 3020.32 | 3042.25 | 2492.24 | 2479.08 | 2505.41 | 3781.44 | 3762.3 | 3800.58 |
| **1970** | 3032.92 | 3022.18 | 3043.66 | 2492.79 | 2479.86 | 2505.71 | 3782.77 | 3764.15 | 3801.38 |
| **1971** | 3045.3 | 3034.6 | 3056 | 2486.6 | 2473.82 | 2499.37 | 3843.14 | 3824.27 | 3862.01 |
| **1972** | 3062.71 | 3052.1 | 3073.31 | 2492.84 | 2480.2 | 2505.48 | 3882.74 | 3863.95 | 3901.53 |
| **1973** | 3058.49 | 3048 | 3068.98 | 2480.2 | 2467.73 | 2492.66 | 3904.8 | 3886.04 | 3923.55 |
| **1974** | 3083.01 | 3072.6 | 3093.42 | 2490.2 | 2477.86 | 2502.54 | 3955.52 | 3936.85 | 3974.18 |
| **1975** | 3064.24 | 3054 | 3074.49 | 2470.66 | 2458.53 | 2482.79 | 3945.26 | 3926.82 | 3963.69 |
| **1976** | 3101.35 | 3091.15 | 3111.54 | 2499.74 | 2487.68 | 2511.8 | 4003.59 | 3985.16 | 4022.02 |
| **1977** | 3116.78 | 3106.67 | 3126.89 | 2507.47 | 2495.53 | 2519.42 | 4040.64 | 4022.27 | 4059.01 |
| **1978** | 3140.6 | 3130.57 | 3150.64 | 2520.27 | 2508.43 | 2532.11 | 4087.16 | 4068.86 | 4105.46 |
| **1979** | 3126.45 | 3116.55 | 3136.35 | 2497.63 | 2485.97 | 2509.29 | 4089.48 | 4071.37 | 4107.59 |
| **1980** | 3186.79 | 3176.85 | 3196.72 | 2556.48 | 2544.78 | 2568.19 | 4160.97 | 4142.77 | 4179.17 |
| **1981** | 3165.25 | 3155.47 | 3175.03 | 2547.83 | 2536.27 | 2559.39 | 4124.01 | 4106.09 | 4141.93 |
| **1982** | 3195.21 | 3185.48 | 3204.94 | 2570.54 | 2559.06 | 2582.03 | 4174.38 | 4156.5 | 4192.25 |
| **1983** | 3208.37 | 3198.72 | 3218.03 | 2583.6 | 2572.19 | 2595.01 | 4191.07 | 4173.33 | 4208.81 |
| **1984** | 3236.2 | 3226.59 | 3245.81 | 2621.3 | 2609.91 | 2632.7 | 4205.9 | 4188.29 | 4223.51 |
| **1985** | 3243.6 | 3234.06 | 3253.13 | 2627.77 | 2616.45 | 2639.09 | 4215.96 | 4198.49 | 4233.43 |
| **1986** | 3248.05 | 3238.59 | 3257.51 | 2635.95 | 2624.71 | 2647.19 | 4217.54 | 4200.21 | 4234.86 |
| **1987** | 3252.36 | 3242.97 | 3261.74 | 2637.41 | 2626.26 | 2648.56 | 4224.51 | 4207.34 | 4241.68 |
| **1988** | 3264.17 | 3254.85 | 3273.49 | 2652.59 | 2641.51 | 2663.67 | 4235.71 | 4218.64 | 4252.78 |
| **1989** | 3290.59 | 3281.31 | 3299.87 | 2678.69 | 2667.66 | 2689.73 | 4261.87 | 4244.9 | 4278.83 |
| **1990** | 3319.58 | 3310.32 | 3328.85 | 2699.19 | 2688.17 | 2710.2 | 4311.69 | 4294.69 | 4328.69 |
| **1991** | 3306.9 | 3297.77 | 3316.03 | 2698.66 | 2687.77 | 2709.55 | 4277.79 | 4261.11 | 4294.48 |
| **1992** | 3281.31 | 3272.32 | 3290.31 | 2683.69 | 2672.95 | 2694.43 | 4238.66 | 4222.24 | 4255.08 |
| **1993** | 3281.57 | 3272.67 | 3290.48 | 2686.93 | 2676.29 | 2697.56 | 4228.74 | 4212.53 | 4244.95 |
| **1994** | 3254.79 | 3246 | 3263.58 | 2680.24 | 2669.71 | 2690.77 | 4169.46 | 4153.55 | 4185.38 |
| **1995** | 3226.52 | 3217.85 | 3235.19 | 2669.41 | 2658.99 | 2679.83 | 4114.27 | 4098.63 | 4129.92 |
| **1996** | 3178.75 | 3170.23 | 3187.28 | 2633.51 | 2623.25 | 2643.78 | 4037.38 | 4022.08 | 4052.69 |
| **1997** | 3128 | 3119.62 | 3136.38 | 2601.39 | 2591.27 | 2611.5 | 3954.49 | 3939.51 | 3969.46 |
| **1998** | 3086.71 | 3078.46 | 3094.96 | 2570.69 | 2560.73 | 2580.66 | 3886.18 | 3871.52 | 3900.84 |
| **1999** | 3086.68 | 3078.5 | 3094.87 | 2575.99 | 2566.09 | 2585.89 | 3875.88 | 3861.38 | 3890.39 |
| **2000** | 3069.26 | 3061.14 | 3077.37 | 2576.83 | 2566.98 | 2586.68 | 3829.71 | 3815.4 | 3844.02 |
| **2001** | 3020.98 | 3012.99 | 3028.96 | 2537.55 | 2527.84 | 2547.25 | 3762.09 | 3748.05 | 3776.12 |
| **2002** | 2988 | 2980.13 | 2995.87 | 2516.22 | 2506.64 | 2525.81 | 3705.8 | 3692.01 | 3719.59 |
| **2003** | 2934.57 | 2926.84 | 2942.31 | 2482.25 | 2472.8 | 2491.7 | 3616.36 | 3602.89 | 3629.83 |
| **2004** | 2871.45 | 2863.85 | 2879.05 | 2432 | 2422.71 | 2441.3 | 3529.97 | 3516.79 | 3543.16 |
| **2005** | 2845.54 | 2838.04 | 2853.04 | 2408.62 | 2399.44 | 2417.8 | 3494.79 | 3481.82 | 3507.75 |
| **2006** | 2795.45 | 2788.08 | 2802.82 | 2378.61 | 2369.55 | 2387.67 | 3409.88 | 3397.23 | 3422.53 |
| **2007** | 2756.42 | 2749.17 | 2763.67 | 2340.41 | 2331.49 | 2349.33 | 3365.68 | 3353.26 | 3378.11 |
| **2008** | 2711.77 | 2704.64 | 2718.89 | 2299.28 | 2290.51 | 2308.04 | 3305.13 | 3292.97 | 3317.29 |
| **2009** | 2667.99 | 2660.98 | 2675 | 2266.49 | 2257.85 | 2275.13 | 3243.72 | 3231.81 | 3255.63 |
| **2010** | 2657 | 2650.06 | 2663.94 | 2256.33 | 2247.76 | 2264.9 | 3228.05 | 3216.28 | 3239.83 |
| **2011** | 2598.03 | 2591.24 | 2604.82 | 2213.54 | 2205.13 | 2221.96 | 3138.15 | 3126.72 | 3149.58 |
| **2012** | 2559.38 | 2552.72 | 2566.04 | 2185.02 | 2176.74 | 2193.3 | 3080.84 | 3069.68 | 3092 |
| **2013** | 2509.68 | 2503.15 | 2516.21 | 2144.75 | 2136.62 | 2152.89 | 3014.68 | 3003.79 | 3025.57 |
| **2014** | 2478.82 | 2472.4 | 2485.24 | 2123.69 | 2115.68 | 2131.71 | 2966.45 | 2955.79 | 2977.11 |
| **2015** | 2437.1 | 2430.81 | 2443.4 | 2089.29 | 2081.41 | 2097.16 | 2910.75 | 2900.32 | 2921.17 |
| **2016** | 2394.67 | 2388.49 | 2400.85 | 2060.8 | 2053.05 | 2068.56 | 2850.92 | 2840.72 | 2861.12 |
| **2017** | 2344.34 | 2338.3 | 2350.39 | 2019.53 | 2011.93 | 2027.12 | 2785.57 | 2775.61 | 2795.52 |
| **2018** | 2292.05 | 2286.14 | 2297.95 | 1977.34 | 1969.9 | 1984.78 | 2718.29 | 2708.6 | 2727.98 |
| **2019** | 2246.78 | 2240.99 | 2252.57 | 1939.61 | 1932.31 | 1946.92 | 2659.26 | 2649.79 | 2668.73 |
| **2020** | 2215.64 | 2209.94 | 2221.34 | 1914.06 | 1906.86 | 1921.26 | 2620.01 | 2610.7 | 2629.31 |
| **2021** | 2253.6 | 2247.81 | 2259.38 | 1963.36 | 1956.01 | 1970.7 | 2645.21 | 2635.76 | 2654.66 |
| **2022** | 2187.2 | 2181.61 | 2192.79 | 1908.39 | 1901.27 | 1915.51 | 2571.83 | 2562.7 | 2580.96 |
| **2023** | 2178.61 | 2173.07 | 2184.16 | 1906.64 | 1899.56 | 1913.71 | 2541.77 | 2532.78 | 2550.76 |
| **Total** | **2917** | **2908.6** | **2925.4** | **2419.4** | **2409.3** | **2429.6** | **3663.9** | **3649.1** | **3678.8** |
| AAMR = Age-Adjusted Mortality Rate; CI = Confidence Interval | | | | | | | | | |

| **Supplementary Table 4: Race-Stratified Cancer-Related Age-Adjusted Mortality Rates (AAMRs) per Million in Adults Aged 25 and Older in the United States (1968–2023)** | | | | | | |
| --- | --- | --- | --- | --- | --- | --- |
| **Year** | **Blacks or African Americans** | | | **Whites** | | |
| **AAMR** | **Lower 95% CI** | **Upper 95% CI** | **AAMR** | **Lower 95% CI** | **Upper 95% CI** |
| **1968** | 3407.91 | 3367.14 | 3448.67 | 3001.18 | 2989.61 | 3012.76 |
| **1969** | 3423.41 | 3383.06 | 3463.76 | 2996.9 | 2985.46 | 3008.34 |
| **1970** | 3449.94 | 3410.03 | 3489.85 | 3002.55 | 2991.33 | 3013.77 |
| **1971** | 3469.37 | 3429.95 | 3508.79 | 3009.34 | 2998.18 | 3020.5 |
| **1972** | 3478.21 | 3439.41 | 3517.01 | 3026.36 | 3015.3 | 3037.43 |
| **1973** | 3582.63 | 3543.78 | 3621.47 | 3013.78 | 3002.84 | 3024.72 |
| **1974** | 3585.99 | 3547.68 | 3624.29 | 3039.76 | 3028.9 | 3050.62 |
| **1975** | 3567.72 | 3530.19 | 3605.24 | 3021.96 | 3011.26 | 3032.66 |
| **1976** | 3635.96 | 3598.56 | 3673.36 | 3058.12 | 3047.47 | 3068.77 |
| **1977** | 3712.67 | 3675.3 | 3750.04 | 3067.2 | 3056.65 | 3077.76 |
| **1978** | 3723.82 | 3686.79 | 3760.85 | 3091.87 | 3081.39 | 3102.36 |
| **1979** | 3761.75 | 3724.8 | 3798.69 | 3074.4 | 3064.06 | 3084.74 |
| **1980** | 3937.97 | 3900.11 | 3975.84 | 3129.32 | 3118.96 | 3139.69 |
| **1981** | 3920.63 | 3883.39 | 3957.88 | 3108.82 | 3098.61 | 3119.04 |
| **1982** | 3976.52 | 3939.43 | 4013.61 | 3138.38 | 3128.21 | 3148.55 |
| **1983** | 4031.86 | 3994.92 | 4068.79 | 3147.36 | 3137.27 | 3157.45 |
| **1984** | 4098.74 | 4061.84 | 4135.64 | 3172.01 | 3161.97 | 3182.06 |
| **1985** | 4097.73 | 4061.13 | 4134.33 | 3181.71 | 3171.73 | 3191.68 |
| **1986** | 4122.23 | 4085.84 | 4158.62 | 3186.19 | 3176.29 | 3196.09 |
| **1987** | 4147.93 | 4111.75 | 4184.11 | 3189.75 | 3179.93 | 3199.58 |
| **1988** | 4159.49 | 4123.58 | 4195.41 | 3201.46 | 3191.69 | 3211.22 |
| **1989** | 4224.71 | 4188.8 | 4260.62 | 3224.91 | 3215.19 | 3234.63 |
| **1990** | 4301.46 | 4265.41 | 4337.52 | 3250.79 | 3241.09 | 3260.5 |
| **1991** | 4276.98 | 4241.44 | 4312.52 | 3240.15 | 3230.57 | 3249.72 |
| **1992** | 4214.72 | 4179.89 | 4249.55 | 3218.06 | 3208.62 | 3227.5 |
| **1993** | 4247.3 | 4212.64 | 4281.95 | 3217.22 | 3207.86 | 3226.57 |
| **1994** | 4163.4 | 4129.47 | 4197.33 | 3196.33 | 3187.09 | 3205.58 |
| **1995** | 4119.67 | 4086.29 | 4153.05 | 3170.35 | 3161.23 | 3179.48 |
| **1996** | 4051.63 | 4018.86 | 4084.4 | 3125.61 | 3116.63 | 3134.6 |
| **1997** | 4003.85 | 3971.61 | 4036.09 | 3074.94 | 3066.09 | 3083.78 |
| **1998** | 3908.45 | 3876.95 | 3939.95 | 3038.62 | 3029.9 | 3047.34 |
| **1999** | 3885.04 | 3853.88 | 3916.2 | 3043.49 | 3034.83 | 3052.15 |
| **2000** | 3823.58 | 3792.89 | 3854.26 | 3032.15 | 3023.55 | 3040.76 |
| **2001** | 3745.79 | 3715.74 | 3775.83 | 2987.35 | 2978.87 | 2995.83 |
| **2002** | 3688.96 | 3659.42 | 3718.5 | 2959.35 | 2950.97 | 2967.72 |
| **2003** | 3602.39 | 3573.49 | 3631.29 | 2908.76 | 2900.51 | 2917 |
| **2004** | 3504.93 | 3476.7 | 3533.16 | 2848.39 | 2840.28 | 2856.5 |
| **2005** | 3439.68 | 3412.09 | 3467.27 | 2826.69 | 2818.67 | 2834.71 |
| **2006** | 3349.01 | 3322.08 | 3375.94 | 2782.95 | 2775.05 | 2790.85 |
| **2007** | 3312.24 | 3285.77 | 3338.71 | 2743.48 | 2735.7 | 2751.27 |
| **2008** | 3208.1 | 3182.41 | 3233.8 | 2703.94 | 2696.27 | 2711.6 |
| **2009** | 3146.51 | 3121.4 | 3171.62 | 2664.19 | 2656.64 | 2671.74 |
| **2010** | 3136.84 | 3112.03 | 3161.65 | 2650.73 | 2643.25 | 2658.22 |
| **2011** | 3059.41 | 3035.37 | 3083.46 | 2595.5 | 2588.15 | 2602.84 |
| **2012** | 2982.24 | 2958.89 | 3005.59 | 2561.17 | 2553.96 | 2568.39 |
| **2013** | 2912.11 | 2889.41 | 2934.8 | 2515.97 | 2508.88 | 2523.06 |
| **2014** | 2856.07 | 2833.99 | 2878.15 | 2489.19 | 2482.2 | 2496.18 |
| **2015** | 2771.92 | 2750.54 | 2793.29 | 2451.15 | 2444.27 | 2458.02 |
| **2016** | 2735.76 | 2714.85 | 2756.67 | 2407.61 | 2400.85 | 2414.37 |
| **2017** | 2659.68 | 2639.39 | 2679.96 | 2362.39 | 2355.75 | 2369.02 |
| **2018** | 2594.96 | 2575.22 | 2614.7 | 2311.32 | 2304.83 | 2317.81 |
| **2019** | 2551.19 | 2531.93 | 2570.45 | 2265.13 | 2258.76 | 2271.5 |
| **2020** | 2483.82 | 2465.09 | 2502.55 | 2238.89 | 2232.61 | 2245.18 |
| **2021** | 2497.64 | 2478.56 | 2516.72 | 2295.14 | 2288.69 | 2301.58 |
| **2022** | 2461.33 | 2442.73 | 2479.93 | 2226.7 | 2220.47 | 2232.94 |
| **2023** | 2410.98 | 2392.78 | 2429.19 | 2225.87 | 2219.66 | 2232.08 |
| **Total** | **3529** | **3498** | **3560.1** | **2887.7** | **2878.8** | **2896.6** |
| AAMR = Age-Adjusted Mortality Rate; CI = Confidence Interval | | | | | | |

| **Supplementary Table 5: Cancer-Related Age-Adjusted Mortality Rates (AAMRs) per Million, Stratified by Census Region (CR), in Adults Aged 25 and Older in the United States (1968–2023)** | | | | |
| --- | --- | --- | --- | --- |
| **Year** | **CR: Northeast** | **CR: Midwest** | **CR: South** | **CR: West** |
| **AAMR** | **AAMR** | **AAMR** | **AAMR** |
| **1968** | 3301.93 | 3039.35 | 2872.99 | 2879.55 |
| **1969** | 3280.9 | 3054.65 | 2873.98 | 2869.6 |
| **1970** | 3287.96 | 3066 | 2916.07 | 2901.46 |
| **1971** | 3294.14 | 3052.07 | 2914.32 | 2898.58 |
| **1972** | 3269.01 | 3080.1 | 2964.43 | 2865.22 |
| **1973** | 3284 | 3057.43 | 2943.48 | 2865.25 |
| **1974** | 3284.7 | 3066.9 | 2974.48 | 2927.19 |
| **1975** | 3294.24 | 3061.9 | 2951.78 | 2917.11 |
| **1976** | 3339.74 | 3113.79 | 3011.29 | 2964.38 |
| **1977** | 3333.91 | 3126.73 | 3034.16 | 2989.81 |
| **1978** | 3366.2 | 3151.04 | 3057.76 | 3003.66 |
| **1979** | 3341.86 | 3143.15 | 3052.25 | 2977.48 |
| **1980** | 3401.7 | 3173.97 | 3127.95 | 3024.53 |
| **1981** | 3345.07 | 3166.5 | 3119.29 | 3010.72 |
| **1982** | 3345.46 | 3206.42 | 3152.26 | 3060.79 |
| **1983** | 3384.3 | 3223.85 | 3174.82 | 3018.44 |
| **1984** | 3393.15 | 3237.42 | 3200.79 | 3098.6 |
| **1985** | 3406.95 | 3245.76 | 3222.74 | 3073.55 |
| **1986** | 3403.18 | 3248.28 | 3241.05 | 3069.09 |
| **1987** | 3402.4 | 3240.08 | 3258.31 | 3076.29 |
| **1988** | 3378.29 | 3272.91 | 3294.17 | 3063.45 |
| **1989** | 3413.95 | 3296.12 | 3336.66 | 3056.26 |
| **1990** | 3416.43 | 3328.35 | 3381.84 | 3084.57 |
| **1991** | 3407.2 | 3330.72 | 3352.74 | 3077.31 |
| **1992** | 3391.12 | 3294.24 | 3341.57 | 3035.74 |
| **1993** | 3352.28 | 3304.33 | 3353.74 | 3044.5 |
| **1994** | 3343.64 | 3270.09 | 3330.51 | 3003.9 |
| **1995** | 3306.8 | 3256.07 | 3303.74 | 2964.38 |
| **1996** | 3262.76 | 3218.92 | 3252.33 | 2908.39 |
| **1997** | 3190.8 | 3151.35 | 3221.35 | 2867.56 |
| **1998** | 3128.92 | 3149.4 | 3167.89 | 2823.58 |
| **1999** | 3129.68 | 3155.3 | 3156.8 | 2839.29 |
| **2000** | 3087.67 | 3137.24 | 3162.91 | 2807.71 |
| **2001** | 3034.9 | 3088.23 | 3110.9 | 2772.78 |
| **2002** | 2990.59 | 3070.09 | 3077.52 | 2738.22 |
| **2003** | 2934.82 | 3011.78 | 3016.32 | 2707.85 |
| **2004** | 2872.09 | 2954.81 | 2963.03 | 2620.92 |
| **2005** | 2825.71 | 2929.75 | 2940.71 | 2608.76 |
| **2006** | 2781.78 | 2898.45 | 2886.37 | 2541.22 |
| **2007** | 2735 | 2855.26 | 2839.29 | 2528.23 |
| **2008** | 2685.79 | 2831.47 | 2797.12 | 2461.44 |
| **2009** | 2640.43 | 2774.78 | 2746.85 | 2446.01 |
| **2010** | 2627.99 | 2768.35 | 2736.07 | 2430.42 |
| **2011** | 2575.04 | 2718.22 | 2676.83 | 2359.3 |
| **2012** | 2525.81 | 2683.11 | 2637.29 | 2329.56 |
| **2013** | 2468.01 | 2629.5 | 2593.6 | 2282.39 |
| **2014** | 2430.28 | 2622.29 | 2556.86 | 2244.17 |
| **2015** | 2387.43 | 2576.42 | 2506.39 | 2225.09 |
| **2016** | 2358.87 | 2526.63 | 2466.85 | 2174.79 |
| **2017** | 2290.09 | 2478.56 | 2418.02 | 2135.77 |
| **2018** | 2222.03 | 2427.26 | 2366.18 | 2093.65 |
| **2019** | 2165.4 | 2388.65 | 2320.44 | 2052.8 |
| **2020** | 2125.01 | 2361.84 | 2288.01 | 2027.48 |
| **2021** | 2102.37 | 2402.42 | 2342.82 | 2086.93 |
| **2022** | 2041.43 | 2317.4 | 2278.97 | 2027.41 |
| **2023** | 2027.39 | 2318.73 | 2272.53 | 2009.88 |
| **Total** | **2989.6** | **2974.2** | **2938.6** | **2713.8** |
| AAMR = Age-Adjusted Mortality Rate | | | | |

| **Supplementary Table 6: Cancer-Related Age-Adjusted Mortality Rates (AAMRs) per Million, Stratified by State, in Adults Aged 25 and Older in the United States (1968–2023)** | | | | |
| --- | --- | --- | --- | --- |
| **State** | **Rank** | **Deaths** | **Age Adjusted Rate** | **Percentile** |
| **District of Columbia** | 1 | 75028 | 3271.05 | 98 |
| **Kentucky** | 2 | 464703 | 3112.26 | 96 |
| **Louisiana** | 3 | 460480 | 3070.04 | 94 |
| **West Virginia** | 4 | 238672 | 3052.95 | 92 |
| **Delaware** | 5 | 86655 | 3041.92 | 90 |
| **Mississippi** | 6 | 297485 | 2993.12 | 88 |
| **Maine** | 7 | 156413 | 2986.16 | 86 |
| **Ohio** | 8 | 1285292 | 2984.35 | 84 |
| **Indiana** | 9 | 647222 | 2954.96 | 82 |
| **Maryland** | 10 | 516028 | 2940.72 | 80 |
| **Rhode Island** | 11 | 124160 | 2919.72 | 78 |
| **Pennsylvania** | 12 | 1538371 | 2917.82 | 76 |
| **Tennessee** | 13 | 607662 | 2917.73 | 75 |
| **Arkansas** | 14 | 306037 | 2906.54 | 73 |
| **Michigan** | 15 | 1018192 | 2905.73 | 71 |
| **Missouri** | 16 | 635358 | 2902.91 | 69 |
| **Oklahoma** | 17 | 374987 | 2896.25 | 67 |
| **Illinois** | 18 | 1284679 | 2888.43 | 65 |
| **New Hampshire** | 19 | 123728 | 2880.22 | 63 |
| **Alabama** | 20 | 479290 | 2876.97 | 61 |
| **New Jersey** | 21 | 909540 | 2854.92 | 59 |
| **Vermont** | 22 | 63449 | 2847.67 | 57 |
| **Nevada** | 23 | 167766 | 2834.38 | 55 |
| **Massachusetts** | 24 | 709662 | 2831.57 | 53 |
| **Virginia** | 25 | 657001 | 2816.2 | 51 |
| **South Carolina** | 26 | 400315 | 2800.99 | 50 |
| **New York** | 27 | 2012982 | 2751.6 | 48 |
| **North Carolina** | 28 | 781160 | 2748.45 | 46 |
| **Alaska** | 29 | 33330 | 2742.03 | 44 |
| **Georgia** | 30 | 678267 | 2738.68 | 42 |
| **Connecticut** | 31 | 365190 | 2736.04 | 40 |
| **Wisconsin** | 32 | 554050 | 2734.83 | 38 |
| **Oregon** | 33 | 346780 | 2728 | 36 |
| **Iowa** | 34 | 337240 | 2713.49 | 34 |
| **Washington** | 35 | 528889 | 2712.49 | 32 |
| **Florida** | 36 | 1863184 | 2684.03 | 30 |
| **Kansas** | 37 | 273534 | 2672.48 | 28 |
| **Texas** | 38 | 1652444 | 2661.88 | 26 |
| **Nebraska** | 39 | 177452 | 2653.86 | 25 |
| **South Dakota** | 40 | 81204 | 2641.6 | 23 |
| **Montana** | 41 | 92685 | 2639.77 | 21 |
| **California** | 42 | 2700250 | 2620.93 | 19 |
| **Minnesota** | 43 | 462755 | 2620.2 | 17 |
| **Wyoming** | 44 | 42690 | 2562.17 | 15 |
| **North Dakota** | 45 | 68101 | 2545.4 | 13 |
| **Arizona** | 46 | 430728 | 2496.07 | 11 |
| **Idaho** | 47 | 109104 | 2488.96 | 9 |
| **New Mexico** | 48 | 140701 | 2432.6 | 7 |
| **Colorado** | 49 | 301177 | 2372.23 | 5 |
| **Hawaii** | 50 | 96903 | 2344.3 | 3 |
| **Utah** | 51 | 117558 | 2121.77 | 1 |

| **Supplementary Table 7: Age-Stratified Cancer-Related Age-Adjusted Mortality Rates (AAMRs) per Million in Adults Aged 25 and Older in the United States (1968–2023)** | | | | | | | | | |
| --- | --- | --- | --- | --- | --- | --- | --- | --- | --- |
| **Year** | **Young Adults (25-44)** | | | **Middle-aged Adults (45-64)** | | | **Old Adults (65+)** | | |
| **AAMR** | **Lower 95% CI** | **Upper 95% CI** | **AAMR** | **Lower 95% CI** | **Upper 95% CI** | **AAMR** | **Lower 95% CI** | **Upper 95% CI** |
| **1968** | 411.4 | 405.45 | 417.34 | 2735.62 | 2719.83 | 2751.42 | 9749.01 | 9701.51 | 9796.51 |
| **1969** | 410.64 | 404.68 | 416.61 | 2725.12 | 2709.47 | 2740.76 | 9752.37 | 9705.52 | 9799.22 |
| **1970** | 399.37 | 393.48 | 405.26 | 2769.57 | 2753.88 | 2785.26 | 9709.22 | 9663.77 | 9754.67 |
| **1971** | 394.16 | 388.3 | 400.01 | 2740.57 | 2725.09 | 2756.05 | 9835.82 | 9790.38 | 9881.25 |
| **1972** | 385.49 | 379.71 | 391.27 | 2761.69 | 2746.24 | 2777.14 | 9908.21 | 9863.26 | 9953.16 |
| **1973** | 375.77 | 370.08 | 381.46 | 2774.17 | 2758.75 | 2789.6 | 9887.63 | 9843.27 | 9932 |
| **1974** | 367.53 | 361.92 | 373.15 | 2815.47 | 2799.99 | 2830.95 | 9959.97 | 9916.14 | 10003.8 |
| **1975** | 355.55 | 350.04 | 361.06 | 2773.7 | 2758.39 | 2789 | 9965.62 | 9922.54 | 10008.7 |
| **1976** | 345.28 | 339.9 | 350.67 | 2801.5 | 2786.18 | 2816.83 | 10130.8 | 10088 | 10173.7 |
| **1977** | 341.9 | 336.6 | 347.2 | 2807.39 | 2792.1 | 2822.69 | 10207.4 | 10165 | 10249.8 |
| **1978** | 332.72 | 327.58 | 337.85 | 2820.7 | 2805.39 | 2836.01 | 10327.6 | 10285.6 | 10369.6 |
| **1979** | 323.82 | 318.83 | 328.81 | 2788.05 | 2772.86 | 2803.23 | 10333.5 | 10292.1 | 10375 |
| **1980** | 327.58 | 322.62 | 332.54 | 2805.85 | 2790.65 | 2821.05 | 10602.1 | 10560.5 | 10643.8 |
| **1981** | 317.14 | 312.33 | 321.95 | 2789.08 | 2773.94 | 2804.22 | 10546 | 10505.2 | 10586.9 |
| **1982** | 312.46 | 307.82 | 317.1 | 2801.16 | 2786 | 2816.32 | 10689.1 | 10648.5 | 10729.7 |
| **1983** | 308.23 | 303.71 | 312.75 | 2796.52 | 2781.4 | 2811.64 | 10774.6 | 10734.3 | 10814.9 |
| **1984** | 314.09 | 309.61 | 318.56 | 2814.64 | 2799.5 | 2829.78 | 10871.3 | 10831.4 | 10911.3 |
| **1985** | 309.97 | 305.6 | 314.33 | 2818.69 | 2803.56 | 2833.82 | 10911.8 | 10872.2 | 10951.4 |
| **1986** | 307.8 | 303.53 | 312.06 | 2777.73 | 2762.72 | 2792.75 | 11011.6 | 10972.3 | 11050.9 |
| **1987** | 294.95 | 290.84 | 299.06 | 2782.99 | 2768 | 2797.99 | 11054.8 | 11015.8 | 11093.7 |
| **1988** | 296.46 | 292.38 | 300.53 | 2766.06 | 2751.2 | 2780.92 | 11141.4 | 11102.7 | 11180.1 |
| **1989** | 291.63 | 287.65 | 295.61 | 2742.27 | 2727.51 | 2757.02 | 11329.8 | 11291.1 | 11368.4 |
| **1990** | 293.5 | 289.56 | 297.44 | 2731.19 | 2716.49 | 2745.89 | 11493.2 | 11454.5 | 11531.8 |
| **1991** | 290.41 | 286.57 | 294.25 | 2697.07 | 2682.55 | 2711.6 | 11495.5 | 11457.4 | 11533.6 |
| **1992** | 286.37 | 282.58 | 290.16 | 2622.12 | 2607.98 | 2636.27 | 11505.8 | 11468.2 | 11543.5 |
| **1993** | 277.48 | 273.78 | 281.17 | 2585.49 | 2571.58 | 2599.41 | 11592.5 | 11555.1 | 11630 |
| **1994** | 273.95 | 270.31 | 277.59 | 2534.8 | 2521.15 | 2548.44 | 11552.9 | 11515.8 | 11590 |
| **1995** | 271.17 | 267.58 | 274.76 | 2471.88 | 2458.55 | 2485.22 | 11525.4 | 11488.7 | 11562.1 |
| **1996** | 266.17 | 262.64 | 269.7 | 2406.03 | 2393.03 | 2419.04 | 11408.5 | 11372.3 | 11444.7 |
| **1997** | 261.49 | 258.01 | 264.98 | 2341.43 | 2328.79 | 2354.08 | 11273.3 | 11237.6 | 11309.1 |
| **1998** | 256.36 | 252.92 | 259.8 | 2274.1 | 2261.86 | 2286.33 | 11192.5 | 11157.1 | 11227.9 |
| **1999** | 247.76 | 244.39 | 251.13 | 2246.42 | 2234.47 | 2258.37 | 11261.3 | 11225.9 | 11296.6 |
| **2000** | 244.19 | 240.84 | 247.54 | 2214.52 | 2202.79 | 2226.24 | 11236.6 | 11201.4 | 11271.8 |
| **2001** | 246.59 | 243.22 | 249.96 | 2175.9 | 2164.49 | 2187.3 | 11051.8 | 11017.1 | 11086.4 |
| **2002** | 241.22 | 237.88 | 244.57 | 2127.58 | 2116.56 | 2138.61 | 10980.6 | 10946.2 | 11015 |
| **2003** | 234.85 | 231.53 | 238.17 | 2083.54 | 2072.83 | 2094.24 | 10799.7 | 10765.7 | 10833.6 |
| **2004** | 225.34 | 222.08 | 228.61 | 2021.98 | 2011.62 | 2032.34 | 10607.3 | 10573.8 | 10640.8 |
| **2005** | 224.27 | 221.01 | 227.53 | 1992.5 | 1982.39 | 2002.6 | 10529.1 | 10495.9 | 10562.2 |
| **2006** | 217.68 | 214.46 | 220.9 | 1954.27 | 1944.42 | 1964.12 | 10355.5 | 10322.9 | 10388.1 |
| **2007** | 208.97 | 205.81 | 212.14 | 1916.67 | 1907.05 | 1926.29 | 10242.4 | 10210.2 | 10274.6 |
| **2008** | 203.98 | 200.83 | 207.12 | 1885.53 | 1876.09 | 1894.96 | 10080.5 | 10048.9 | 10112.1 |
| **2009** | 205.46 | 202.28 | 208.63 | 1870.3 | 1861.02 | 1879.58 | 9879.74 | 9848.7 | 9910.78 |
| **2010** | 196.84 | 193.73 | 199.95 | 1856.47 | 1847.31 | 1865.62 | 9868.14 | 9837.33 | 9898.94 |
| **2011** | 195.33 | 192.22 | 198.45 | 1825.78 | 1816.8 | 1834.76 | 9623.91 | 9593.84 | 9653.97 |
| **2012** | 192.05 | 188.97 | 195.14 | 1810.52 | 1801.59 | 1819.45 | 9460.68 | 9431.31 | 9490.06 |
| **2013** | 191.93 | 188.85 | 195.02 | 1773.04 | 1764.23 | 1781.85 | 9272.53 | 9243.84 | 9301.21 |
| **2014** | 189.53 | 186.47 | 192.59 | 1756.4 | 1747.67 | 1765.12 | 9149.56 | 9121.44 | 9177.68 |
| **2015** | 184.73 | 181.72 | 187.75 | 1721.27 | 1712.67 | 1729.86 | 9009.16 | 8981.62 | 9036.69 |
| **2016** | 185.51 | 182.5 | 188.53 | 1688.42 | 1679.93 | 1696.91 | 8847.91 | 8820.96 | 8874.86 |
| **2017** | 181.68 | 178.7 | 184.65 | 1636.63 | 1628.28 | 1644.97 | 8690.49 | 8664.18 | 8716.8 |
| **2018** | 177.23 | 174.31 | 180.16 | 1602.96 | 1594.7 | 1611.22 | 8492.54 | 8466.97 | 8518.12 |
| **2019** | 175.41 | 172.51 | 178.3 | 1562.99 | 1554.8 | 1571.17 | 8335.49 | 8310.53 | 8360.46 |
| **2020** | 174.18 | 171.31 | 177.05 | 1541.62 | 1533.48 | 1549.77 | 8216.59 | 8192.13 | 8241.05 |
| **2021** | 176.79 | 173.93 | 179.65 | 1492.36 | 1484.38 | 1500.34 | 8491.21 | 8466.01 | 8516.41 |
| **2022** | 175.87 | 173.03 | 178.71 | 1482.42 | 1474.42 | 1490.43 | 8171.1 | 8147.13 | 8195.08 |
| **2023** | 173.7 | 170.89 | 176.51 | 1447.55 | 1439.63 | 1455.48 | 8193.58 | 8169.76 | 8217.4 |
| **Total** | **269.1** | **265.2** | **273.1** | **2313.6** | **2301.2** | **2325.9** | **10224.8** | **10189** | **10260.6** |
| AAMR = Age-Adjusted Mortality Rate; CI = Confidence Interval | | | | | | | | | |

| **Supplementary Table 8: Annual Percent Change (APC) of Cancer-Related Age-Adjusted Mortality Rates (AAMRs) per Million in Adults Aged 25 and Older in the United States (1968–2023)** | | | | |
| --- | --- | --- | --- | --- |
| **Year Interval** | **APC** | **Lower CI** | **Upper CI** | **P-Value** |
| **Overall** | | | | |
| 1968-1991 | 0.4406* | 0.4018 | 0.4838 | 0.0116 |
| 1991-2001 | -0.9319 | -1.0631 | 0.1828 | 0.05279 |
| 2001-2015 | -1.5239* | -1.5823 | -0.9715 | 0.0004 |
| 2015-2019 | -2.0210* | -2.3931 | -1.6156 | < 0.000001 |
| 2019-2023 | -0.7370* | -1.0559 | -0.1746 | 0.0248 |
| **Women** | | | | |
| 1968-1975 | -0.1601 | -0.5394 | 0.0927 | 0.16557 |
| 1975-1991 | 0.5723* | 0.436 | 0.6822 | 0.03239 |
| 1991-2001 | -0.6191 | -0.7603 | 0.5751 | 0.11358 |
| 2001-2016 | -1.4014* | -1.4515 | -0.5809 | 0.002 |
| 2016-2019 | -2.0033* | -2.2559 | -1.4441 | < 0.000001 |
| 2019-2023 | -0.3583 | -0.6697 | 0.2319 | 0.14237 |
| **Men** | | | | |
| 1968-1980 | 0.8235* | 0.7122 | 0.9855 | 0.0064 |
| 1980-1991 | 0.3659* | 0.1788 | 0.5375 | 0.0148 |
| 1991-2000 | -1.3161 | -1.4479 | 0.3237 | 0.06599 |
| 2000-2015 | -1.7891* | -1.8432 | -1.3373 | < 0.000001 |
| 2015-2019 | -2.2429* | -2.5901 | -1.8634 | < 0.000001 |
| 2019-2023 | -1.0566* | -1.3566 | -0.5025 | 0.0048 |
| **Blacks or African Americans** | | | | |
| 1968-1976 | 0.8335 | -0.071 | 1.2111 | 0.05839 |
| 1976-1982 | 1.6096* | 0.5001 | 2.4098 | 0.03079 |
| 1982-1991 | 0.8421 | -1.3689 | 1.0239 | 0.11158 |
| 1991-2000 | -1.2793* | -2.0088 | -0.9915 | 0.0044 |
| 2000-2020 | -2.1146* | -2.338 | -2.0609 | < 0.000001 |
| 2020-2023 | -1.0334* | -1.8292 | -0.1039 | 0.026 |
| **Whites** | | | | |
| 1968-1991 | 0.3948* | 0.3513 | 0.4398 | 0.0168 |
| 1991-2001 | -0.8316 | -0.9753 | 0.3214 | 0.06799 |
| 2001-2015 | -1.4079* | -1.4725 | -0.8428 | 0.0004 |
| 2015-2019 | -1.9263* | -2.3199 | -1.495 | < 0.000001 |
| 2019-2023 | -0.4107 | -0.7609 | 0.1699 | 0.10958 |
| **Midwest** | | | | |
| 1968-1991 | 0.4278* | 0.3773 | 0.4839 | < 0.000001 |
| 1991-2001 | -0.6912* | -0.8646 | -0.4937 | < 0.000001 |
| 2001-2023 | -1.3576* | -1.4087 | -1.3142 | < 0.000001 |
| **Northeast** | | | | |
| 1968-1990 | 0.2078* | 0.1649 | 0.269 | 0.0012 |
| 1990-1995 | -0.6346* | -1.2364 | -0.1047 | 0.02959 |
| 1995-2012 | -1.5730* | -1.6555 | -1.503 | < 0.000001 |
| 2012-2023 | -2.0820* | -2.2423 | -1.9682 | < 0.000001 |
| **South** | | | | |
| 1968-1992 | 0.7136* | 0.6692 | 0.7615 | < 0.000001 |
| 1992-2002 | -0.9364* | -1.0929 | -0.7496 | 0.0012 |
| 2002-2020 | -1.5880* | -1.6574 | -1.5407 | < 0.000001 |
| 2020-2023 | -0.4207 | -1.0103 | 0.4636 | 0.23515 |
| **West** | | | | |
| 1968-1990 | 0.3725* | 0.3055 | 0.4496 | < 0.000001 |
| 1990-2002 | -1.0592* | -1.2151 | -0.8743 | 0.0008 |
| 2002-2019 | -1.6408* | -1.7704 | -1.573 | < 0.000001 |
| 2019-2023 | -0.5679 | -1.1059 | 0.3957 | 0.15597 |
| **Young Adults (25-44)** | | | | |
| 1968-1979 | -2.2526* | -2.515 | -2.0335 | 0.0012 |
| 1979-1991 | -0.9928* | -1.1987 | -0.4465 | 0.0188 |
| 1991-2002 | -1.6980* | -1.9582 | -1.3465 | 0.0012 |
| 2002-2010 | -2.4326* | -3.4319 | -2.04 | 0.0044 |
| 2010-2023 | -1.0455* | -1.2295 | -0.8233 | 0.0032 |
| **Middle-aged Adults (45-64)** | | | | |
| 1968-1984 | 0.1592* | 0.0922 | 0.2509 | 0.0004 |
| 1984-1990 | -0.4776* | -1.0107 | -0.1687 | 0.0068 |
| 1990-2006 | -2.1156* | -2.1997 | -2.0453 | < 0.000001 |
| 2006-2014 | -1.2754* | -1.4518 | -0.872 | 0.0004 |
| 2014-2023 | -2.1766* | -2.3571 | -2.0431 | < 0.000001 |
| **Old Adults (65+)** | | | | |
| 1968-1993 | 0.7795* | 0.7137 | 0.8445 | 0.0216 |
| 1993-2001 | -0.5868 | -0.8264 | 0.8068 | 0.15117 |
| 2001-2010 | -1.3491* | -1.5158 | -0.5873 | 0.0064 |
| 2010-2019 | -1.7617* | -2.309 | -1.5771 | < 0.000001 |
| 2019-2023 | -0.4625 | -0.9035 | 0.2567 | 0.13917 |
| APC = annual percent change; * Indicates that the APC is significantly different from zero at α = 0.05. AAMR = age-adjusted mortality rate; CI = Confidence Interval | | | | |
